# Supplementary material for: Single-Nucleotide Polymorphism 309T>G in the MDM2 Promoter Determines Functional Outcome After Stroke
Source: PubMed Central journal article supplement — Stroke. 2018 Aug 30;49(10):2437–44. doi: 10.1161/STROKEAHA.118.022529 (PMC6159670; doi:10.1161/strokeaha.118.022529), 2018-08-30
Supplement: str-49-2437-s002.pdf [file str-49-2437-s002.pdf]

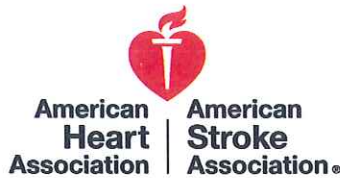

## Acknowledgment Permission Form

Journal Stroke

Manuscript Number STROKE/2018/022529D

First Author Cristina Rodríguez

Title of Work The single-nucleotide polymorphism 309T>G in the MDM2 promoter determines functional outcome after stroke

Authors must provide written permission/approval from all individuals mentioned by name in the Acknowledgments section of a submitted manuscript. By signing this form, any and all acknowledged persons therefore state that they have read and approved the mention of their names in the Acknowledgment section of the aforementioned paper.

| Name                             | Signature          | Date          |
|----------------------------------|--------------------|---------------|
| Name (1) <u>Lucia Martin</u>     | <u>[Signature]</u> | <u>3/8/18</u> |
| Name (2) <u>Estefania Prieto</u> | <u>[Signature]</u> | <u>3/8/18</u> |
| Name (3) <u>Monica Carabias</u>  | <u>[Signature]</u> | <u>2/8/18</u> |
| Name (4) <u>Monica Resch</u>     | <u>[Signature]</u> | <u>2/8/18</u> |
| Name (5) <u>Dolores Veroz</u>    | <u>[Signature]</u> | <u>3/8/18</u> |
| Name (6) _____                   | Signature _____    | Date _____    |
| Name (7) _____                   | Signature _____    | Date _____    |
| Name (8) _____                   | Signature _____    | Date _____    |
| Name (9) _____                   | Signature _____    | Date _____    |
| Name (10) _____                  | Signature _____    | Date _____    |
| Name (11) _____                  | Signature _____    | Date _____    |
| Name (12) _____                  | Signature _____    | Date _____    |
| Name (13) _____                  | Signature _____    | Date _____    |
| Name (14) _____                  | Signature _____    | Date _____    |
| Name (15) _____                  | Signature _____    | Date _____    |
| Name (16) _____                  | Signature _____    | Date _____    |
| Name (17) _____                  | Signature _____    | Date _____    |
| Name (18) _____                  | Signature _____    | Date _____    |
| Name (19) _____                  | Signature _____    | Date _____    |
| Name (20) _____                  | Signature _____    | Date _____    |
