# Supplementary material for: Single-Nucleotide Polymorphism 309T>G in the MDM2 Promoter Determines Functional Outcome After Stroke
Source: PubMed Central journal article supplement — Stroke. 2018 Aug 30;49(10):2437–44. doi: 10.1161/STROKEAHA.118.022529 (PMC6159670; doi:10.1161/strokeaha.118.022529), 2018-08-30
Supplement: str-49-2437-s003.pdf [file str-49-2437-s003.pdf]

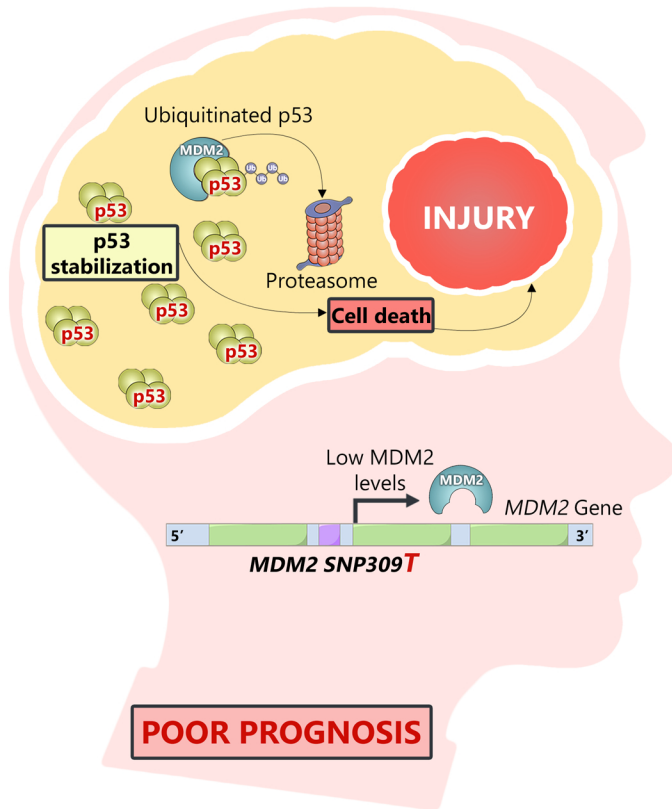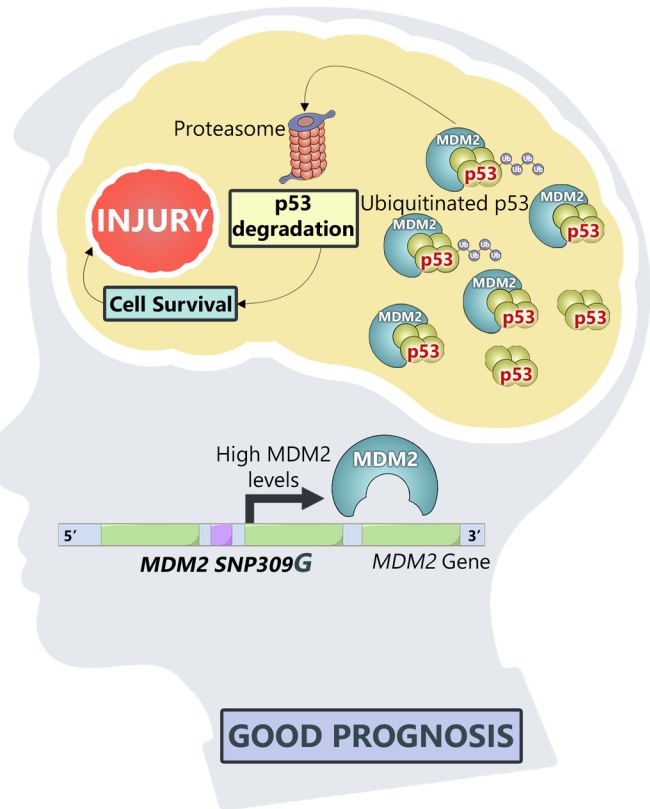

The MDM2 SNP309 regulates MDM2 expression and determines functional outcome after stroke. MDM2 is the main negative regulator of p53, which plays a key role in neuronal apoptosis after cerebral ischemia and intracerebral hemorrhage. The functional SNP309 in the *MDM2* intronic promoter modulates MDM2 protein expression, therefore affecting p53 proteasomal degradation. Patients harboring the G allele had higher MDM2 levels, which promotes p53 degradation and cellular survival, all leading to decreased brain injury and better functional outcome after stroke than those with the T/T genotype. (Ub: ubiquitin).
